1                                    **Dynamic Processing of Displacement Loops**  
2                                    **During Recombinational DNA Repair**

3  
4  
5  
6    Aurèle Piazza<sup>1,3</sup>, Shanaya Shah<sup>1</sup>, William Douglass Wright<sup>1</sup>, Steven K. Gore<sup>1</sup>, Romain Koszul<sup>3</sup>  
7                                    and Wolf-Dietrich Heyer<sup>1,2,\*</sup>

8  
9  
10  
11    <sup>1</sup>Department of Microbiology and Molecular Genetics, <sup>2</sup>Department of Molecular and Cellular  
12    Biology, One Shields Ave, University of California, Davis, CA 95616, USA, <sup>3</sup>Spatial Regulation  
13    of Genomes, Department of Genomes and Genetics, Institut Pasteur, 28 Rue du Docteur Roux,  
14                                    75015 Paris, France

15  
16  
17    \*Corresponding author. E-mail: wdheyer@ucdavis.edu Phone: +1 (530) 752-3001

18  
19  
20  
21    **Keywords** : D-loop, helicase, heteroduplex DNA, homologous recombination, topoisomerase

## 1 **Abstract**

2 Displacement-loops (D-loops) are pivotal intermediates of homologous recombination (HR), a  
3 universal DNA double strand break (DSB) repair pathway. We developed a versatile assay for  
4 the physical detection of D-loops *in vivo*, which enabled studying the kinetics of their formation  
5 and defining the network of D-loop formation and reversal pathways. Nascent D-loops are  
6 detected within 2 hrs of DSB formation and extended over the next 2 hrs in a system allowing  
7 break-induced replication. The majority of D-loops are disrupted in wild type cells by two  
8 pathways: one supported by the Srs2 helicase and the other by the Mph1 helicase and the Sgs1-  
9 Top3-Rmi1 helicase-topoisomerase complex. Both pathways operate without significant overlap  
10 and are delineated by the Rad54 paralog Rdh54 in an ATPase-independent fashion. This study  
11 uncovers a novel layer of HR control in cells relying on nascent D-loop dynamics, revealing  
12 unsuspected complexities, and identifying a surprising role for a conserved Rad54 paralog.

## 13 **Introduction**

14 Homologous recombination (HR) repairs DNA double-strand breaks (DSBs) by exploiting an  
15 intact homologous double-strand DNA (dsDNA) molecule as a template. It proceeds in a  
16 succession of metastable intermediates, which confers flexibility and kinetic proof-reading at  
17 every non-covalent steps of the pathway (Heyer, 2015; Kanaar et al., 2008; Zinovyev et al.,  
18 2013). First, a helical filament of Rad51, a member of the RecA family, and associated proteins  
19 is assembled onto the 3'-protruding ssDNA generated upon DSB resection, which can be several  
20 kilobases long (Mimitou and Symington, 2008; Zhu et al., 2008). This multivalent filament  
21 harnesses the ssDNA sequence information to interrogate nearby dsDNA molecules (Bell and  
22 Kowalczykowski, 2016) as it dynamically weaves through the nuclear volume (Dion et al., 2012;  
23 Mine-Hattab and Rothstein, 2012). Upon successful identification of homology, Rad51/Rad54-  
24 catalyzed DNA strand invasion results in a nascent displacement loop (D-loop) intermediate of  
25 possibly varied architectures depending on length and whether the invasion involves the 3'-end  
26 or not (Wright and Heyer, 2014) and see below). The salient features of D-loops consist of at  
27 least a partially Rad51-free heteroduplex DNA (hDNA), a displaced ssDNA, and junctions at  
28 both extremities of the hDNA tract (**Fig. 1A**). Initiation of recombination-associated DNA  
29 synthesis by Pol $\delta$  primed from the 3'-OH end of the invading strand represents a decision point

1 in HR and is forming an extended D-loop. DNA synthesis restores the sequence information  
2 disrupted by the DSB. While disruption of nascent D-loops is a mechanism of anti-  
3 recombination, disruption of extended D-loops represent a mechanism of crossover avoidance  
4 enforcing non-crossover (NCO) outcome. Indeed, HR pathway choice (Gangloff et al., 2000;  
5 Shor et al., 2002), accuracy (Putnam and Kolodner, 2017) and outcome (Ira et al., 2003; Mazon  
6 and Symington, 2013; Mitchel et al., 2013; Prakash et al., 2009) are believed to at least partly  
7 rely on D-loop reversal (reviewed in refs. (Daley et al., 2014; Heyer, 2015)).

8 Several proteins have been implicated in joint molecule/D-loop turnover, whose defects  
9 specifically cause repeat-mediated genomic instability (Putnam et al., 2009). The 3'-5' Srs2  
10 helicase (putative homologs human FBH1 or RTEL1) is a negative regulator of HR likely acting  
11 at various steps of the pathway, Rad51 filament disruption and D-loop reversal. Srs2-deficient  
12 cells exhibit recombination-dependent lethality and genomic instability (Elango et al., 2017;  
13 Gangloff et al., 2000; Putnam et al., 2009). They also fail to mature NCO products in mitosis (Ira  
14 et al., 2003; Mitchel et al., 2013) as well as meiosis (Palladino, 1991), and are less prone to  
15 template switch during break-induced replication (BIR) (Ruiz et al., 2009), suggesting that Srs2  
16 disrupts extended D-loops. *In vitro* Srs2 dismantles Rad51 filaments left unprotected by Rad55-  
17 Rad57 (Krejci et al., 2003; Liu et al., 2011; Veaute et al., 2003) and disrupts Rad51/Rad54-  
18 mediated nascent and extended D-loops (Liu et al., 2017). The 3'-5' Mph1 helicase (human  
19 FANCM) funnels HR towards the NCO repair outcome (Mazon and Symington, 2013; Mitchel  
20 et al., 2013; Prakash et al., 2009; Sun et al., 2008; Tay et al., 2010), inhibits break-induced  
21 replication (BIR) (Jain et al., 2016; Luke-Glaser and Luke, 2012), and promotes template-switch  
22 during BIR (Stafa et al., 2014). Consistently, purified Mph1 disrupts short synthetic or  
23 Rad51/Rad54-mediated nascent and extended D-loops *in vitro* (Prakash et al., 2009; Sebesta et  
24 al., 2011; Zheng et al., 2011). The helicase/topoisomerase complex Sgs1-Top3-Rmi1 (STR,  
25 human BLM-TOPO3 $\alpha$ -RMI1/2) limits formation and/or accumulation of various joint molecules  
26 including double Holliday Junction (dHJ) in somatic and meiotic cells (Bzymek et al., 2010;  
27 Kaur et al., 2015; Oh et al., 2007; Tang et al., 2015), inhibits CO and/or promote the NCO repair  
28 outcome of HR (Ira et al., 2003; Lo et al., 2006; Mazon and Symington, 2013; Mitchel et al.,  
29 2013; Tay et al., 2010), and inhibits BIR and long gap-repair (Jain et al., 2009; Jain et al., 2016).  
30 *In vitro*, STR dissolves dHJs (Cejka et al., 2010; Wu and Hickson, 2003) and D-loops (Fasching

1 et al., 2015). dHJ dissolution requires both the Sgs1 helicase and Top3 topoisomerase activity.  
2 The STR complex is a complex D-loop disruption machine that can target protein-free D-loops  
3 through the helicase activity of Sgs1 and Rad51-Rad54-bound D-loops by the type 1A  
4 topoisomerase activity of Top3 (Fasching et al., 2015).

5 This large body of joint biochemical and genetic evidence established these factors as HR  
6 regulators enforcing the accuracy of the pathway (Heyer, 2015). Yet, the mechanisms by which  
7 they do so, including their precise substrates, interactions, and pathway organization remain  
8 elusive. Furthermore, the function of certain Rad51-ssDNA-associated proteins involved in  
9 regulating the DNA strand exchange reaction are not straightforwardly addressed *in vitro*, as the  
10 substrate and the conditions in which the reaction takes place are unknown. These limitations  
11 derive in good part from the technical inability to physically detect D-loops in somatic cells,  
12 unlike dHJ intermediates which can be detected by two-dimensional gel electrophoresis in  
13 meiotic and somatic cells (Bzymek et al., 2010; Schwacha and Kleckner, 1995). We developed  
14 the D-loop Capture (DLC) assay, a proximity ligation-based methodology that enables studying  
15 D-loop metabolism. This study confirms the D-loop disruption activities of multiple HR  
16 regulators and, by defining their interactions, reveals unanticipated complexities in nascent D-  
17 loops metabolism.

## 18 **Results**

### 19 **The D-loop Capture (DLC) assay**

20 The rationale of the DLC assay is depicted in **Fig. 1A**. The design is versatile, and we developed  
21 a specific protocol and controls for application in *Saccharomyces cerevisiae* (**Figs. 1B** and **S1**;  
22 **STAR Methods**). Because the donor lacks homology to the right side of the break, our genetic  
23 design purposely restrict joint molecules to nascent and extended D-loops (**Fig. 1B**). The DSB-  
24 inducible and ectopic donor constructs are located at interstitial chromosomal loci and represent  
25 untethered and unconstrained location that have been extensively used by others (Agmon et al.,  
26 2013; Inbar and Kupiec, 1999; Mazon and Symington, 2013; Mine-Hattab and Rothstein, 2012).  
27 Following site-specific DSB induction (step 1) and DNA strand invasion at the donor, *in vivo*  
28 inter-strand DNA crosslinking with psoralen (Oh et al., 2009) covalently links the hybrid DNA  
29 (hDNA) within the D-loop to preserve its structure (step 2). The restriction site ablated by DSB

1 resection is restored by annealing a long complementary oligonucleotide (step 3). Following  
2 restriction digestion (step 3), the ligation reaction performed in dilute conditions leads to  
3 preferential ligation of tethered DNA extremities, *i.e.* those held together by the crosslinked  
4 hDNA (step 4), a rationale common to all 3C-like approaches (Dekker et al., 2002). The unique  
5 chimeric ligation product is quantified by qPCR (step 5; details on normalization see **STAR**  
6 **Methods** and **Fig. S1**), and is referred to as the DLC signal.

7 As expected, the DLC signal depends on DSB formation (**Fig. 1C**), homology between the  
8 broken and donor molecules (**Fig. 1D**), and the central HR proteins required for filament  
9 assembly (Rad52) (Zelensky et al., 2014) and DNA strand invasion (Rad51 and Rad54)  
10 (Petukhova et al., 1998) (**Fig. 1E**). Contrary to previous proxy assays for DNA strand invasion  
11 (Rad51 ChIP at the donor locus)(Sugawara et al., 2003), the DLC signal requires homology  
12 (Renkawitz et al., 2013) and Rad54, consistent with biochemical data (Petukhova et al., 1998;  
13 Wright and Heyer, 2014). Together with the reliance of DLC on homology, D-loop stabilization  
14 by psoralen crosslinking and restoration of the restriction site eliminated by resection (**Fig. 1F**),  
15 these results demonstrate that the DLC assay detects D-loops and not nonspecific contacts  
16 between the broken and the donor molecule.

### 17 **Limitations of the DLC assay**

18 A first limitation of the DLC assay resides in the psoralen-mediated inter-strand crosslink density  
19 ( $\approx 1/500$  bp) (Oh et al., 2009). Since the *in vivo* hDNA length distribution is unknown, the DLC  
20 assay cannot distinguish between a single long and several shorter D-loops comprising the same  
21 total length of hDNA (**Fig. S2A**). Consequently, a change in DLC can reflect either an increase  
22 of the average hDNA length or an increase of the amount of D-loops in the cell population.

23 Second, upon long-range DNA synthesis, the D-loop will move away from the homologous  
24 donor loci and thus from the upstream restriction site. If it migrates past a downstream *EcoRI*  
25 site (located 11.1 kb away in our design), it will cause a physical uncoupling between the hDNA  
26 (*i.e.* the crosslink point between invading and donor molecules) and the upstream restriction site  
27 used for DLC chimera formation, thus precluding proximity ligation of both partners (**Fig. S2B**).  
28 In this study, we focus mainly on nascent D-loops, *i.e.* before extension by DNA polymerase,  
29 avoiding this potential limitation.

## 1 **Nascent and extended D-loops are temporally resolved**

2 The fast and synchronous DSB induction upon HO expression ( $\approx 90\%$  molecules cleaved within  
3 30 minutes) enables kinetic study of the subsequent repair steps (Connolly et al., 1988; Hicks et  
4 al., 2011; White and Haber, 1990). D-loop formation is first detected 1 hr after DSB induction  
5 and increases 40-fold over 3-4 hr when it peaks before declining slightly (**Fig. 2A**). D-loop  
6 extension (monitored with another recently developed assay (Piazza et al., 2018); **Fig. S3**)  
7 follows with a  $\approx 2$  hrs delay: first detected at 4 hr, it peaks at 6 hr and plateaus (**Fig. 2A**). The  
8 mean time between half the DSB are formed ( $\approx 20$  min) and half the maximum DLC and DLE  
9 signals are reached is  $DLC_{50} = 122 \pm 13$  min and  $DLE_{50} = 278 \pm 23$  min, respectively (**Fig.**  
10 **2B**). This delay enables the separate study of nascent and extended D-loops at 2 and 6 hr post-  
11 DSB induction, respectively.

## 12 **Role of Srs2, Mph1 and STR in the dynamics of nascent and extended D-loops**

13 We addressed the role of the Mph1 and Srs2 helicases as well as the helicase-topoisomerase STR  
14 complex in nascent and extended D-loop metabolism. Deletion of either *MPH1* or *SRS2* results  
15 in a significant 2-3 fold DLC increase at all time points (**Figs. 3A** and **3C**, respectively). The  
16 decrease observed between 2 and 4-6 hours in the *srs2 $\Delta$*  mutant, from 2.9 to 1.8-fold over WT  
17 levels, is not statistically significant (**Fig. 3C**). The ATPase-deficient *mph1-D209N* and *srs2-*  
18 *K41A* mutants also exhibit elevated DLC levels compared to wild type, not significantly different  
19 from the corresponding deletion mutants (**Figs. 3B** and **3D**, respectively). Thus, both helicases  
20 inhibit the DLC signal, and hence steady-state levels of D-loops in wild type cells depend on  
21 their catalytic activity. These results are consistent with earlier biochemical evidence showing  
22 that Mph1 and Srs2 disrupt both Rad51/Rad54-made nascent and extended D-loops in an  
23 ATPase-dependent fashion (Liu et al., 2017; Prakash et al., 2009; Sebesta et al., 2011).

24 In contrast, STR significantly inhibits DLC only at the earliest time point: a *sgs1 $\Delta$*  mutant  
25 exhibits a significant 2-fold DLC increase at 2 hrs post-DSB induction but not at 4 and 6 hrs  
26 (**Fig. 3E**). Unlike Mph1 and Srs2, DLC in the ATPase-deficient *sgs1-K706A* mutant is  
27 significantly lower than in the deletion mutant and not significantly different from wild type  
28 (**Fig. 3F**), indicating that the STR inhibitory effect requires the physical presence of Sgs1 but is  
29 largely independent of its helicase activity. Previous genetic observations showed that a subset of

1 STR roles requires the physical presence of Sgs1 and its ability to interact with Top3, but is  
2 independent of its helicase activity (Jain et al., 2009; Lo et al., 2006; Weinstein and Rothstein,  
3 2008). Furthermore, the topoisomerase activity of Top3, but not the helicase activity of Sgs1, is  
4 required for STR to disrupt Rad51/Rad54-mediated D-loops in reconstituted biochemical  
5 reactions (Fasching et al., 2015). To avoid working with the slow-growing and suppressor-prone  
6 *top3Δ* mutant, we addressed the role of the topoisomerase activity of Top3 upon induced  
7 overexpression of the dominant-negative catalytic-deficient *top3-Y356F* (referred to as *top3-cd*)  
8 mutant (Oakley et al., 2002). Overexpression of *TOP3* does not affect DLC, indicating that  
9 excess Top3 is unlikely partnered with Rmi and Sgs1 and ineffective at DLC inhibition (**Fig.**  
10 **3G**). However, overexpression of *top3-cd* leads to a  $\approx 2.5$ -fold DLC increase over the empty  
11 vector control (**Fig. 3G**), an increase similar to that observed in a *sgs1Δ* mutant. *TOP3* and *SGS1*  
12 are epistatic, as neither *TOP3* nor *top3-cd* overexpression affects DLC levels in a *sgs1Δ* mutant  
13 (**Fig. 3G**). Overexpression of *top3-cd* in *sgs1-K706A* cells yields an intermediate, although non-  
14 significant, effect compared to either wild type or *sgs1Δ* cells (**Fig. 3G**). This intermediate effect  
15 may suggest a subtle contribution of Sgs1 helicase activity to STR-mediated D-loop disruption.  
16 These results show that nascent D-loop disruption requires the topoisomerase activity of Top3-  
17 Rmi1, and the physical presence but largely not the helicase activity of Sgs1. The non-catalytic  
18 role of Sgs1 could be to promote DNA strand passage during the Top3-Rmi1-mediated  
19 decatenation (Cejka et al., 2012), a reaction believed to underlie disruption of relatively short D-  
20 loops by STR (Fasching et al., 2015). Alternatively, Sgs1 may help target Top3-Rmi1 to its  
21 substrates .

22 In conclusion, these results provide direct evidence for three D-loop disruption activities in yeast.  
23 STR disrupts nascent D-loops in a topoisomerase-dependent and mostly helicase-independent  
24 fashion. Srs2 and Mph1 disrupt both nascent and extended D-loops in a helicase-dependent  
25 fashion.

## 26 **STR and Mph1 are part of the same nascent D-loop disruption pathway**

27 We next investigated the genetic interactions between these D-loop disruption activities,  
28 focusing on nascent D-loop regulation. Cells defective for both Mph1 and STR do not exhibit  
29 additional DLC increase: the DLC profile in the *mph1Δ sgs1Δ* double mutant resembles that of a  
30 *sgs1Δ* single mutant at all time points (**Fig. 4A**). Furthermore, *top3-cd* overexpression in the

1 absence of Mph1 does not yield further nascent DLC increase (**Fig. S4A**). This epistatic  
2 relationship is independent of the helicase activity of STR (**Fig. 4B**). These results indicate that  
3 STR and Mph1 operate in the same nascent D-loop disruption pathway. Regulation of extended  
4 D-loops is more complex, as the increased DLC observed at 6 hr in the *mph1Δ* mutant depends  
5 on STR (**Fig. 4A**), suggesting an antagonistic role in this context.

### 6 **STR-Mph1 and Srs2 are independent pathways targeting non-overlapping nascent D-loop** 7 **substrates**

8 We next addressed the genetic interactions of *SRS2* with *STR* and *MPH1* on nascent D-loop  
9 metabolism. First, overexpression of *top3-cd* in a *srs2Δ* mutant causes a significant 1.9-fold DLC  
10 increase over the empty vector control (**Fig. 5A**), suggesting that Srs2 operates in a different D-  
11 loop disruption pathway than STR. In order to avoid the HR-dependent synthetic sickness of the  
12 double-deletion mutants (Gangloff et al., 2000; Lee et al., 1999; Mullen et al., 2001; Prakash et  
13 al., 2009) that are prone to acquire suppressors, we used an auxin-inducible degron version of  
14 Srs2 (Srs2-AID; **Methods**). Srs2-AID depletion induced prior to DSB formation (**Figs. 5B** and  
15 **S5D**) causes a 2.4-fold DLC increase, similar to that observed in a *srs2Δ* mutant (**Fig. 5C**). This  
16 result validates the *SRS2-AID* system for effectively depleting Srs2 protein and function. Srs2  
17 degradation also leads to a significant DLC increase in the *sgs1Δ* and *mph1Δ* mutant background  
18 (**Fig. 5D**). Importantly, the *absolute* DLC increase observed upon Srs2 depletion in these mutants  
19 is not significantly different from what is seen in a wild type strain (**Fig. 5E**), indicating that the  
20 defect imparted by the absence of Srs2 is additive to that of the other mutations. The absence of  
21 epistasis or synergy but apparent additivity between the Srs2 and the STR-Mph1 disruption  
22 pathways indicate (i) that they target different nascent D-loop substrates, and (ii) that these  
23 substrates do not interconvert.

### 24 **Rdh54 inhibits nascent D-loops in an ATPase-independent fashion as part of the STR-** 25 **Mph1 pathway**

26 We sought to determine the apical determinant(s) of these two nascent D-loop disruption  
27 pathways. We surmised that it should involve components of the DNA strand invasion apparatus.  
28 Rdh54 (formerly known as Tid1) is a DNA translocase (Nimonkar et al., 2007; Prasad et al.,  
29 2007) primarily known for its role in meiosis (Klein, 1997; Shinohara et al., 1997), where it acts



1 with Dmc1 for DNA strand invasion in a similar fashion as Rad54 acts with Rad51 in somatic  
2 cells (Nimonkar et al., 2012). Yet, contrary to its Dmc1 partner, Rdh54 is expressed in somatic  
3 cells (Lee et al., 2001), where it promotes inter-chromosomal template-switching during gene  
4 conversion and BIR (Anand et al., 2014; Tsaponina and Haber, 2014) and adaptation following  
5 DSB repair (Ferrari et al., 2013; Lee et al., 2001). Rdh54 physically interacts with Rad51 *in vitro*  
6 (Busygina et al., 2008; Petukhova et al., 2000) in an ATPase-independent fashion (Santa Maria  
7 et al., 2013) and in two-hybrids experiments in cells (Dresser et al., 1997). Furthermore, Rdh54  
8 is recruited to DSBs in a Rad51-dependent fashion (Lisby et al., 2004), phosphorylated in  
9 response to DNA damage (Ferrari et al., 2013) and promotes engagement of dsDNA by Rad51  
10 during homology search redundantly with Rad54 (Renkawitz et al., 2013). These observations  
11 suggest that Rdh54 is part of the Rad51-ssDNA filament in cells, similarly to Rad54 (Kiianitsa et  
12 al., 2006; Sanchez et al., 2013).

13 Deletion of *RDH54* causes a strong ( $\approx 3$ -fold) DLC increase at early time points corresponding to  
14 nascent D-loops (**Fig. 6A**). Intriguingly, the ATPase-defective *rdh54-K318R* mutant did not  
15 cause DLC increase, indicating that the early inhibitory effect of Rdh54 is exerted independent  
16 of its catalytic activity (**Fig. 6B**). *RDH54* is epistatic to *SGS1* and *MPH1*, as any mutant  
17 combination exhibits a similar  $\approx 3$ -fold DLC increase over wild type (**Fig. 6C**). This result was  
18 corroborated upon *top3-cd* overexpression in *rdh54Δ* and *rdh54Δ sgs1Δ* cells, which did not  
19 exhibit significant increase over the empty vector control (**Fig. S6A**). Consequently, Rdh54  
20 belongs to the STR-Mph1 nascent D-loop disruption pathway.

### 21 ***RDH54* exhibits unique genetic interactions with *SRS2***

22 Combined defect of Srs2 with either STR or Mph1 causes HR-dependent synthetic sickness  
23 (Gangloff et al., 2000; Lee et al., 1999; Mullen et al., 2001; Prakash et al., 2009). Contrary to the  
24 *mph1Δ srs2Δ* and *sgs1Δ srs2Δ* mutants, *rdh54Δ srs2Δ* cells exhibit no major growth defect (**Fig.**  
25 **S6B**). Remarkably, the *rdh54Δ srs2Δ* mutant exhibits a strong nascent DLC increase, 12-fold  
26 over wild type levels (**Fig. 6D**). This increase is 4-fold higher than any single mutant, indicating  
27 that *SRS2* and *RDH54* synergistically inhibit nascent D-loop. Hence, Rdh54 is epistatic to the  
28 STR-Mph1 disruption axis but exhibits unique genetic interactions with the Srs2 pathway, both  
29 for DLC (synergy) and viability (no synthetic lethality). No synergy is observed in the *rdh54-*  
30 *K318R srs2Δ* mutant (**Fig. 6E**), confirming that the catalytic activity of Rdh54 is not required for

1 its role in DLC inhibition. Based on these results, we propose that Rdh54 demarcates the two  
2 nascent D-loop disruption pathways (see below and **Figure 7**).

### 3 **Discussion**

#### 4 **The DLC assay: a versatile tool for studying DNA strand invasion in cells**

5 The DLC assay enables physical detection in cells of D-loops, a central yet elusive intermediate  
6 of the HR pathway. More generally, this assay can detect any association between DNA  
7 molecules mediated by a regional hDNA crosslinkable with psoralen. The simple rationale  
8 related to 3C-type approaches and the large dynamic range (spanning over three orders of  
9 magnitude) of the qPCR readout grants applicability to experimental systems with less frequent  
10 DSB formation and/or DNA strand invasion than in our system. For example, we previously  
11 used a variant of this assay to detect the multi-invasion HR byproduct (Piazza et al., 2017). Since  
12 psoralen has already been extensively used in a variety of organisms (including mammalian  
13 cells) and DSB delivery by CRISPR-Cas9 is nearly universally applicable, we expect this  
14 versatile approach to open the way for physical study of the HR process in various organisms  
15 and cell types.

#### 16 **Nascent D-loop dynamics: implications for HR fidelity and outcome**

17 The steady-state DLC increase observed in various mutants reveals that the majority of D-loops  
18 formed at a perfectly homologous 2 kb-long donor are normally being disrupted in wild type  
19 cells. We provide direct evidence for three activities underlying this nascent and/or extended D-  
20 loop turnover in *S. cerevisiae* cells: Srs2 and Mph1 disrupt both nascent and extended D-loops in  
21 a helicase-dependent fashion, and STR disrupts nascent D-loops in a topoisomerase-dependent  
22 and largely helicase-independent fashion. Hence, D-loops exist in a dynamic equilibrium that is  
23 enforced by multiple regulatory activities, confirming prior conclusions drawn from end-point  
24 assays and modelling (Coic et al., 2011; Zinovyev et al., 2013). This dynamics is likely to  
25 account for the ~2 hours delay observed between D-loop formation and extension.

26 While extended D-loop disruption is integral to the SDSA pathway, the role of disruption  
27 activities targeting perfectly homologous nascent D-loop is less straightforward within the  
28 current HR framework, but we speculate it participates in HR fidelity in three main ways. First,  
29 we showed previously that these activities inhibit multi-invasion-induced rearrangements, a

1 tripartite recombination mechanism involving the cleavage of internal and terminal nascent D-  
2 loops (Piazza and Heyer, 2018; Piazza et al., 2017). It also applies to single D-loop cleavage  
3 causing half-CO (Deem et al., 2008; Hum and Jinks-Robertson, 2018; Mazon and Symington,  
4 2013; Pardo and Aguilera, 2012; Smith et al., 2009). Second, nascent D-loop turnover is  
5 expected to enforce homology search stringency (and thus HR fidelity) by requiring several  
6 rounds of donor interrogation prior to initiation of recombinational DNA synthesis (Coic et al.,  
7 2011). Hence, a blind sampling engine that has no knowledge whether it has reached the best  
8 genomic target is afforded a “second chance”. Given that homology length stimulate and that  
9 sequence divergence inhibits sequence recognition by the Rad51-ssDNA filament (Bell and  
10 Kowalczykowski, 2016), this kinetic proofreading strategy is expected to funnel the searching  
11 molecule towards the longest and most similar donor available. Indeed, in the absence of a  
12 homologous donor to compete with a homeologous one, disruption cycles are futile and uncover  
13 the tolerance to mispaired bases of the Rad51-ssDNA homology search engine (Anand et al.,  
14 2017; Lee et al., 2017). Consequently, when studying the homology search process and its  
15 accuracy in cells, one has to consider not only the imperfectly stringent dsDNA sampling activity  
16 by the core Rad51-ssDNA filament, but also the context of multiple cycles of  
17 invasion/disruption. Third, owing to the extended D-loop turnover that requires to re-initiate the  
18 whole pathway, such a mechanism would disproportionately inhibit repair requiring long  
19 extension tracts, thus overpowering mutagenic repair such as BIR with  
20 invasion/(synthesis/)disruption cycles. Consistently, the three nascent D-loop disruption  
21 activities defined here (Mph1, STR, and Srs2) suppress BIR or long gap repair (Jain et al., 2009;  
22 Jain et al., 2016; Luke-Glaser and Luke, 2012; Ruiz et al., 2009; Stafa et al., 2014), even though  
23 we show that STR does not promote extended D-loop disruption.

24 Furthermore, the CO outcome of HR has been associated with longer gene conversion tracts than  
25 NCO outcome (Aguilera and Klein, 1989; Ahn and Livingston, 1986; Guo et al., 2017; Maloisel  
26 et al., 2004). Since COs pose a risk of LOH at the subsequent cell generation, they are  
27 suppressed in somatic cells. Cells impaired for STR and Mph1 activities are proficient in  
28 chromosomal DSB repair but are partially deficient in CO suppression (Ira et al., 2003; Mazon  
29 and Symington, 2013; Prakash et al., 2009). Since the CO outcome of HR likely entails the  
30 formation of a dHJ intermediate (Szostak et al., 1983), the CO suppression defect of these  
31 mutants has been proposed to result from both the avoidance of dHJ intermediates by disrupting

1 extended D-loops by Mph1 (Crismani et al., 2012; Lorenz et al., 2012; Mazon and Symington,  
2 2013; Prakash et al., 2009) as well as the dissolution of dHJ intermediates by STR to prevent  
3 their endonuclease-mediated resolution into CO (Bizard and Hickson, 2014). An expectation of  
4 such sequential activities is a synergistic increase in CO upon inactivation of both pathways. Yet,  
5 the combined deletion of *MPH1* and *SGS1* is not synergic nor even additive for CO formation  
6 (Mazon and Symington, 2013; Mitchel et al., 2013; Tay et al., 2010). It rather indicates that STR  
7 and Mph1 mainly suppress CO as part of the same pathway, congruent with our nascent D-loop  
8 disruption results. Since donor invasion by both ends of the DSB and/or a second-end capture of  
9 the displaced strand of the extended D-loop is required for dHJ and CO formation, it suggests  
10 that the nascent D-loop turnover supported by STR-Mph1 could be a component of the negative  
11 regulation of CO formation. The fact that nascent D-loop reversal participates of CO suppression  
12 might help explain the overlap between *cis* and *trans* determinants that protect both against  
13 ectopic recombination and CO, such as sequence divergence (Tay et al., 2010; Welz-Voegele  
14 and Jinks-Robertson, 2008), homology length (Inbar et al., 2000; Jinks-Robertson et al., 1993),  
15 and the aforementioned D-loop disruption activities (Myung et al., 2001; Putnam et al., 2009;  
16 Putnam et al., 2016). Hence, the fate of the HR outcome could be tied at least partly to the nature  
17 of the initial or early DNA joint molecule intermediate. This interpretation holds implications for  
18 the yet unresolved CO designation step during meiosis that has been proposed to occur at the  
19 level of an early and undetected HR intermediate (presumably a nascent or short extended D-  
20 loop) (Hunter and Kleckner, 2001). The mechanism could involve specific stabilization of a  
21 nascent or short extended D-loop intermediate to provide the time for a second invasion or end  
22 capture and dHJ formation.

### 23 **A complex network of proteins enforces D-loop dynamics**

24 Genetic interaction between these regulatory activities also revealed unexpected complexities in  
25 nascent D-loop metabolism (**Figs. 4 and 5**). Indeed, STR with Mph1 and Srs2 define two  
26 independent nascent D-loop disruption pathways (**Fig. 7**). Importantly, combined elimination of  
27 any member of both pathways results in an additive increase in D-loop levels. This additivity  
28 implies that the two pathways target non-overlapping and non-interconvertible nascent D-loop  
29 species. Congruent with this idea, Mph1 and Srs2 defects behave differently with respect to HR  
30 outcome: Mph1 promotes NCO formation from substrates that can otherwise be salvaged as CO,

1 while Srs2 substrates cannot and remain unrepaired in Srs2-defective cells (Ira et al., 2003;  
2 Mazon and Symington, 2013; Prakash et al., 2009).

3 We propose a model for nascent D-loop metabolism by STR-Mph1 and Srs2 in which Rdh54  
4 acts as a gate keeper in delineating the two disruption pathways (**Fig. 7**). Rdh54 promotes the  
5 formation of a substrate for the STR-Mph1 axis, while escapers are exclusively disrupted by  
6 Srs2. In particular, this model explains why, despite being part of the Mph1-STR D-loop  
7 disruption axis, defects of Rdh54 could synergize with those of a Srs2-defective strains in term  
8 of DLC (see below and **Fig. S6A** for more details).

9 How does Rdh54 exerts its demarcation role? And what distinguishes the two disruption  
10 pathways? The ATPase-independent role of Rdh54 rules out chromatin remodeling (Kwon et al.,  
11 2008), change in DNA supercoiling (Chi et al., 2006; Petukhova et al., 2000; Prasad et al., 2007),  
12 joint molecule disruption (Nimonkar et al., 2007), or Rad51 stripping from dsDNA (Chi et al.,  
13 2006) in the pathway demarcation process. Furthermore, the synergistic DLC increase  
14 specifically observed in *rdh54Δ srs2Δ*, but not in cells deficient for Srs2 and any member of the  
15 Mph1-STR disruption pathway, suggests that Srs2 substrates potentially contain longer hDNA  
16 than the substrates funneled by Rdh54 to the STR-Mph1 disruption pathway. Rdh54 could limit  
17 hDNA length by acting as a roadblock for Rad54-mediated hDNA formation (Wright and Heyer,  
18 2014). Whether the hDNA length *per se* or architectural features (*e.g.* internal *versus* end  
19 invasion) distinguishes the two nascent D-loop species, and hence their targeting by one or the  
20 other pathway, remains to be addressed (**Fig. S6B**). Indeed, DNA strand invasion can occur not  
21 only at the 3'-OH extremity but also internally, although slightly less efficiently (Adzuma, 1992;  
22 Piazza et al., 2017; Wright and Heyer, 2014). Internal invasions likely exhibit altered  
23 architecture compared to terminal D-loop, both at the level of hDNA and the 5' and 3' junctions  
24 (Wright et al., 2018). How these structural features are recognized and guide differential  
25 processing by the Srs2 and STR-Mph1 (and possibly other) pathways remains to be addressed.

26 In conclusion, this work reveals a novel layer of HR control at the DNA strand invasion and  
27 nascent joint molecule levels, clarifies the interactions between several HR regulators, and  
28 suggests unanticipated roles for conserved Rad51-associated factors such as the Rad54 paralog,  
29 proteins of as yet poorly defined function.

## 1 **Acknowledgements**

2 We thank members of the Heyer, Hunter and Kowalczykowski laboratories for helpful  
3 discussions, Ian Hickson for providing the *TOP3* overexpression vectors, and Hannah Klein for  
4 providing the *rdh54-K318R* mutant. We thank Abou Ibrahim-Biangoro and Noelle Cabral for  
5 help with strains construction. We are particularly grateful to Sue Jinks-Robertson and Pallavi  
6 Rajput for their critical reading of the manuscript.

## 7 **Funding**

8 AP was supported by fellowships from the ARC Foundation, the EMBO (ALTF-238-2013), the  
9 Framework Project 7 of the European Union (Marie Curie International Outgoing Fellowship  
10 628355) administered by the Institut Pasteur, France, and received financial support from the  
11 Philippe Foundation. This research used core services supported by P30 CA93373 and was  
12 supported by NIH grants GM58015 and CA92276 to WDH, and MeioRec ANR-13-BSV6-0012-  
13 02 to RK.

## 14 **Authors contributions**

15 AP and WDH conceived the project and wrote the manuscript, with input and editing from WW  
16 and RK. AP designed, performed and analyzed the experiments. SS and SKG performed and  
17 analyzed the experiments.

## 18 **Declaration of interests**

19 The authors declare no conflict of interests.

20

## 1 **References**

- 2 Adzuma, K. (1992). Stable synopsis of homologous DNA molecules mediated by the *Escherichia coli*  
3 RecA protein involves local exchange of DNA strands. *Genes Dev.* 6, 1679-1694.
- 4 Agmon, N., Liefshitz, B., Zimmer, C., Fabre, E., and Kupiec, M. (2013). Effect of nuclear architecture on  
5 the efficiency of double-strand break repair. *Nat. Cell Biol.* 15, 694–699.
- 6 Aguilera, A., and Klein, H.L. (1989). Yeast intrachromosomal recombination: long gene conversion tracts  
7 are preferentially associated with reciprocal exchange and require the *RAD1* and *RAD3* gene products.  
8 *Genetics* 123, 683-694.
- 9 Ahn, B.Y., and Livingston, D.M. (1986). Mitotic gene conversion lengths, coconversion patterns, and the  
10 incidence of reciprocal recombination in a *Saccharomyces cerevisiae* plasmid system. *Mol. Cell. Biol.* 6,  
11 3685-3693.
- 12 Anand, R., Beach, A., Li, K., and Haber, J. (2017). Rad51-mediated double-strand break repair and  
13 mismatch correction of divergent substrates. *Nature* 544, 377-380.
- 14 Anand, R.P., Tsaponina, O., Greenwell, P.W., Lee, C.S., Du, W., Petes, T.D., and Haber, J.E. (2014).  
15 Chromosome rearrangements via template switching between diverged repeated sequences. *Genes Dev.*  
16 28, 2394-2406.
- 17 Bell, J.C., and Kowalczykowski, S.C. (2016). RecA: regulation and mechanism of a molecular search  
18 engine. *Trends Biochem. Sci.* 41, 491-507.
- 19 Berger, A.B., Cabal, G.G., Fabre, E., Duong, T., Buc, H., Nehrbass, U., Olivo-Marin, J.C., Gadal, O., and  
20 Zimmer, C. (2008). High-resolution statistical mapping reveals gene territories in live yeast. *Nat. Methods*  
21 5, 1031-1037.
- 22 Bizard, A.H., and Hickson, I.D. (2014). The dissolution of double Holliday junctions. *Cold Spr. Harb.*  
23 *Persp. Biol.* 8.
- 24 Busygina, V., Sehorn, M.G., Shi, I.Y., Tsubouchi, H., Roeder, G.S., and Sung, P. (2008). Hed1 regulates  
25 Rad51-mediated recombination via a novel mechanism. *Genes Dev.* 22, 786-795.
- 26 Bzymek, M., Thayer, N.H., Oh, S.D., Kleckner, N., and Hunter, N. (2010). Double Holliday junctions are  
27 intermediates of DNA break repair. *Nature* 464, 937-941.
- 28 Cejka, P., Plank, J.L., Bachrati, C.Z., Hickson, I.D., and Kowalczykowski, S.C. (2010). Rmi1 stimulates  
29 decatenation of double Holliday junctions during dissolution by Sgs1-Top3. *Nat. Struct. Mol. Biol.* 17,  
30 1377-1382.
- 31 Cejka, P., Plank, J.L., Dombrowski, C.C., and Kowalczykowski, S.C. (2012). Decatenation of DNA by  
32 the *S. cerevisiae* Sgs1-Top3-Rmi1 and RPA Complex: a mechanism for disentangling chromosomes.  
33 *Mol. Cell* 47, 886-896.
- 34 Chi, P., Kwon, Y., Seong, C., Epshtein, A., Lam, I., Sung, P., and Klein, H.L. (2006). Yeast  
35 recombination factor Rdh54 functionally interacts with the Rad51 recombinase and catalyzes Rad51  
36 removal from DNA. *J. Biol. Chem.* 281, 26268-26279.
- 37 Coic, E., Martin, J., Ryu, T., Tay, S.Y., Kondev, J., and Haber, J.E. (2011). Dynamics of homology  
38 searching during gene conversion in *Saccharomyces cerevisiae* revealed by donor competition. *Genetics*  
39 189, 1225-1233.
- 40 Connolly, B., White, C.I., and Haber, J.E. (1988). Physical monitoring of mating type switching in  
41 *Saccharomyces cerevisiae*. *Mol. Cell. Biol.* 8, 2342-2349.
- 42 Crismani, W., Girard, C., Froger, N., Pradillo, M., Santos, J.L., Chelysheva, L., Copenhaver, G.P.,  
43 Horlow, C., and Mercier, R. (2012). FANCM limits meiotic crossovers. *Science* 336, 1588-1590.
- 44 Daley, J.M., Gaines, W.A., Kwon, Y., and Sung, P. (2014). Regulation of DNA pairing in homologous  
45 recombination. *Cold Spr. Harb. Persp. Biol.* 6.
- 46 Deem, A., Barker, K., VanHulle, K., Downing, B., Vayl, A., and Malkova, A. (2008). Defective break-  
47 induced replication leads to half-crossovers in *Saccharomyces cerevisiae*. *Genetics* 179, 1845-1860.
- 48 Dekker, J., Rippe, K., Dekker, M., and Kleckner, N. (2002). Capturing chromosome conformation.  
49 *Science* 295, 1306-1311.

- 1 Dion, V., Kalck, V., Horigome, C., Towbin, B.D., and Gasser, S.M. (2012). Increased mobility of double-  
2 strand breaks requires Mec1, Rad9 and the homologous recombination machinery. *Nat. Cell Biol.* *14*,  
3 502-U221.
- 4 Dresser, M.E., Ewing, D.J., Conrad, M.N., Dominguez, A.M., Barstead, R., Jiang, H., and Kodadek, T.  
5 (1997). *DMC1* functions in a *Saccharomyces cerevisiae* meiotic pathway that is largely independent of  
6 the *RAD51* pathway. *Genetics* *147*, 533-544.
- 7 Duan, Z., Andronescu, M., Schutz, K., McIlwain, S., Kim, Y.J., Lee, C., Shendure, J., Fields, S., Blau,  
8 C.A., and Noble, W.S. (2010). A three-dimensional model of the yeast genome. *Nature* *465*, 363-367.
- 9 Elango, R., Sheng, Z., Jackson, J., DeCata, J., Ibrahim, Y., Pham, N.T., Liang, D.H., Sakofsky, C.J.,  
10 Vindigni, A., Lobachev, K.S., *et al.* (2017). Break-induced replication promotes formation of lethal joint  
11 molecules dissolved by Srs2. *Nat. Commun.* *8*, 1790.
- 12 Fasching, C.L., Cejka, P., Kowalczykowski, S.C., and Heyer, W.D. (2015). Top3-Rmi1 dissolve Rad51-  
13 mediated D-loops by a topoisomerase-based mechanism. *Mol. Cell* *57*, 595-606.
- 14 Ferrari, M., Nachimuthu, B.T., Donnianni, R.A., Klein, H., and Pellicioli, A. (2013). Tid1/Rdh54  
15 translocase is phosphorylated through a Mec1-and Rad53-dependent manner in the presence of DSB  
16 lesions in budding yeast. *DNA Rep.* *12*, 347-355.
- 17 Fishman Lobell, J., and Haber, J.E. (1992). Removal of nonhomologous DNA ends in double-strand  
18 break recombination - the role of the yeast ultraviolet repair gene *RAD1*. *Science* *258*, 480-484.
- 19 Gangloff, S., Soustelle, C., and Fabre, F. (2000). Homologous recombination is responsible for cell death  
20 in the absence of the Sgs1 and Srs2 helicases. *Nat. Genet.* *25*, 192-194.
- 21 Guo, X., Hum, Y.F., Lehner, K., and Jinks-Robertson, S. (2017). Regulation of hetDNA length during  
22 mitotic double-strand break repair in yeast. *Mol. Cell* *67*, 539-549 e534.
- 23 Heyer, W.D. (2015). Regulation of recombination and genomic maintenance. *Cold Spr. Harb. Persp. Biol.*  
24 *7*.
- 25 Hicks, W.M., Yamaguchi, M., and Haber, J.E. (2011). Real-time analysis of double-strand DNA break  
26 repair by homologous recombination. *Proc. Nat. Acad. Sci. USA* *108*, 3108-3115.
- 27 Hum, Y.F., and Jinks-Robertson, S. (2018). DNA strand-exchange patterns associated with double-strand  
28 break-induced and spontaneous mitotic crossovers in *Saccharomyces cerevisiae*. *PLoS Genet.* *14*,  
29 e1007302.
- 30 Hunter, N., and Kleckner, N. (2001). The single-end invasion: an asymmetric intermediate at the double  
31 strand break to double Holliday junction transition of meiotic recombination. *Cell* *106*, 59-70.
- 32 Inbar, O., and Kupiec, M. (1999). Homology search and choice of homologous partner during mitotic  
33 recombination. *Mol. Cell. Biol.* *19*, 4134-4142.
- 34 Inbar, O., Liefshitz, B., Bitan, G., and Kupiec, M. (2000). The relationship between homology length and  
35 crossing over during the repair of a broken chromosome. *J. Biol. Chem.* *275*, 30833-30838.
- 36 Ira, G., Malkova, A., Liberi, G., Foiani, M., and Haber, J.E. (2003). Srs2 and Sgs1-Top3 suppress  
37 crossovers during double-strand break repair in yeast. *Cell* *115*, 401-411.
- 38 Jain, S., Sugawara, N., Lydeard, J., Vaze, M., Tanguy Le Gac, N., and Haber, J.E. (2009). A  
39 recombination execution checkpoint regulates the choice of homologous recombination pathway during  
40 DNA double-strand break repair. *Genes Dev.* *23*, 291-303.
- 41 Jain, S., Sugawara, N., Mehta, A., Ryu, T., and Haber, J.E. (2016). Sgs1 and Mph1 helicases enforce the  
42 recombination execution checkpoint during DNA double-strand break repair in *Saccharomyces*  
43 *cerevisiae*. *Genetics* *203*, 667-675.
- 44 Jinks-Robertson, S., Michelitch, M., and Ramcharan, S. (1993). Substrate length requirements for  
45 efficient mitotic recombination in *Saccharomyces cerevisiae*. *Mol. Cell. Biol.* *13*, 3937-3950.
- 46 Kanaar, R., Wyman, C., and Rothstein, R. (2008). Quality control of DNA break metabolism: in the 'end',  
47 it's a good thing. *EMBO J.* *27*, 581-588.
- 48 Kaur, H., De Muyt, A., and Lichten, M. (2015). Top3-Rmi1 DNA single-strand decatenase is integral to  
49 the formation and resolution of meiotic recombination intermediates. *Mol. Cell* *57*, 583-594.
- 50 Kiianitsa, K., Solinger, J.A., and Heyer, W.D. (2006). Terminal association of Rad54 protein with the  
51 Rad51-dsDNA filament. *Proc. Natl. Acad. Sci. USA* *103*, 9767-9772.



- 1 Klein, H.L. (1997). *RDH54*, a *RAD54* homologue in *Saccharomyces cerevisiae*, is required for mitotic  
2 diploid-specific recombination and repair and for meiosis. *Genetics* 147, 1533-1543.
- 3 Krejci, L., Van Komen, S., Li, Y., Villemain, J., Reddy, M.S., Klein, H., Ellenberger, T., and Sung, P.  
4 (2003). DNA helicase Srs2 disrupts the Rad51 presynaptic filament. *Nature* 423, 305-309.
- 5 Kwon, Y.H., Seong, C., Chi, P., Greene, E.C., Klein, H., and Sung, P. (2008). ATP-dependent chromatin  
6 remodeling by the *Saccharomyces cerevisiae* homologous recombination factor Rdh54. *J. Biol. Chem.*  
7 283, 10445-10452.
- 8 Lee, J.Y., Steinfeld, J.B., Qi, Z., Kwon, Y., Sung, P., and Greene, E.C. (2017). Sequence imperfections  
9 and base triplet recognition by the Rad51/RecA family of recombinases. *J. Biol. Chem.* 292, 11125-  
10 11135.
- 11 Lee, S.E., Pelliccioli, A., Malkova, A., Foiani, M., and Haber, J.E. (2001). The *Saccharomyces*  
12 recombination protein Tid1p is required for adaptation from G2/M arrest induced by a double-strand  
13 break. *Curr. Biol.* 11, 1053-1057.
- 14 Lee, S.K., Johnson, R.E., Yu, S.L., Prakash, L., and Prakash, S. (1999). Requirement of yeast *SGS1* and  
15 *SRS2* genes for replication and transcription. *Science* 286, 2339-2342.
- 16 Lisby, M., Barlow, J.H., Burgess, R.C., and Rothstein, R. (2004). Choreography of the DNA damage  
17 response: Spatiotemporal relationships among checkpoint and repair proteins. *Cell* 118, 699-713.
- 18 Liu, J., Ede, C., Wright, W.D., Gore, S.K., Jenkins, S.S., Freudenthal, B.D., Todd Washington, M.,  
19 Veaute, X., and Heyer, W.D. (2017). Srs2 promotes synthesis-dependent strand annealing by disrupting  
20 DNA polymerase delta-extending D-loops. *Elife* 6.
- 21 Liu, J., Renault, L., Veaute, X., Fabre, F., Stahlberg, H., and Heyer, W.-D. (2011). Rad51 paralogs  
22 Rad55-Rad57 balance the anti-recombinase function of Srs2 in Rad51 pre-synaptic filament formation.  
23 *Nature* 479, 245-248.
- 24 Lo, Y.C., Paffett, K.S., Amit, O., Cliekernan, J.A., Sterk, R., Brenneman, M.A., and Nickoloff, J.A.  
25 (2006). Sgs1 regulates gene conversion tract lengths and crossovers independently of its helicase activity.  
26 *Mol. Cell. Biol.* 26, 4086-4094.
- 27 Lorenz, A., Osman, F., Sun, W., Nandi, S., Steinacher, R., and Whitby, M.C. (2012). The fission yeast  
28 FANCM ortholog directs non-crossover recombination during meiosis. *Science* 336, 1585-1588.
- 29 Luke-Glaser, S., and Luke, B. (2012). The Mph1 helicase can promote telomere uncapping and premature  
30 senescence in budding yeast. *PloS one* 7.
- 31 Maloisel, L., Bhargava, J., and Roeder, G.S. (2004). A role for DNA polymerase delta in gene conversion  
32 and crossing over during meiosis in *Saccharomyces cerevisiae*. *Genetics* 167, 1133-1142.
- 33 Mazon, G., and Symington, L.S. (2013). Mph1 and Mus81-Mms4 prevent aberrant processing of mitotic  
34 recombination intermediates. *Mol. Cell* 52, 63-74.
- 35 Mimitou, E.P., and Symington, L.S. (2008). Sae2, Exo1 and Sgs1 collaborate in DNA double-strand  
36 break processing. *Nature* 455, 770-774.
- 37 Mine-Hattab, J., and Rothstein, R. (2012). Increased chromosome mobility facilitates homology search  
38 during recombination. *Nat. Cell Biol.* 14, 510-517.
- 39 Mitchel, K., Lehner, K., and Jinks-Robertson, S. (2013). Heteroduplex DNA position defines the roles of  
40 the Sgs1, Srs2, and Mph1 helicases in promoting distinct recombination outcomes. *PLoS Genet.* 9.
- 41 Morawska, M., and Ulrich, H.D. (2013). An expanded tool kit for the auxin-inducible degron system in  
42 budding yeast. *Yeast* 30, 341-351.
- 43 Morrow, D.M., Connelly, C., and Hieter, P. (1997). "Break copy" duplication: A model for chromosome  
44 fragment formation in *Saccharomyces cerevisiae*. *Genetics* 147, 371-382.
- 45 Mullen, J.R., Kaliraman, V., Ibrahim, S.S., and Brill, S.J. (2001). Requirement for three novel protein  
46 complexes in the absence of the *sgs1* DNA helicase in *Saccharomyces cerevisiae*. *Genetics* 157, 103-118.
- 47 Myung, K., Datta, A., Chen, C., and Kolodner, R.D. (2001). *SGS1*, the *Saccharomyces cerevisiae*  
48 homologue of *BLM* and *WRN*, suppresses genome instability and homeologous recombination. *Nat.*  
49 *Genet.* 27, 113-116.

- 1 Nimonkar, A.V., Amitani, I., Baskin, R.J., and Kowalczykowski, S.C. (2007). Single-molecule imaging  
2 of Tid1/Rdh54, a Rad54 homolog that translocates on duplex DNA and can disrupt joint molecules. *J.*  
3 *Biol. Chem.* 282, 30776-30784.
- 4 Nimonkar, A.V., Dombrowski, C.C., Siino, J.S., Stasiak, A.Z., Stasiak, A., and Kowalczykowski, S.C.  
5 (2012). *Saccharomyces cerevisiae* Dmc1 and Rad51 proteins preferentially function with Tid1 and Rad54  
6 proteins, respectively, to promote DNA strand invasion during genetic recombination. *J. Biol. Chem.* 287,  
7 28727-28737.
- 8 Oakley, T.J., Goodwin, A., Chakraverty, R.K., and Hickson, I.D. (2002). Inactivation of homologous  
9 recombination suppresses defects in topoisomerase III-deficient mutants. *DNA Rep.* 1, 463-482.
- 10 Oakley, T.J., and Hickson, I.D. (2002). Defending genome integrity during S-phase: putative roles for  
11 RecQ helicases and topoisomerase III. *DNA Rep.* 1, 175-207.
- 12 Oh, S.D., Jessop, L., Lao, J.P., Allers, T., Lichten, M., and Hunter, N. (2009). Stabilization and  
13 electrophoretic analysis of meiotic recombination intermediates in *Saccharomyces cerevisiae*. *Methods*  
14 *Mol. Biol.* (Clifton, N.J) 557, 209-234.
- 15 Oh, S.D., Lao, J.P., Hwang, P.Y.H., Taylor, A.F., Smith, G.R., and Hunter, N. (2007). BLM ortholog,  
16 Sgs1, prevents aberrant crossing-over by suppressing formation of multichromatid joint molecules. *Cell*  
17 130, 259-272.
- 18 Palladino, F. (1991). Genetic characterization of the *HPR5* helicase gene of *Saccharomyces cerevisiae*.  
19 Ph.D. Thesis, New York University.
- 20 Pannunzio, N.R., Manthey, G.M., and Bailis, A.M. (2008). *RAD59* is required for efficient repair of  
21 simultaneous double-strand breaks resulting in translocations in *Saccharomyces cerevisiae*. *DNA Rep.* 7,  
22 788-800.
- 23 Pardo, B., and Aguilera, A. (2012). Complex chromosomal rearrangements mediated by break-induced  
24 replication involve structure-selective endonucleases. *PLoS Genet.* 8.
- 25 Petukhova, G., Stratton, S., and Sung, P. (1998). Catalysis of homologous DNA pairing by yeast Rad51  
26 and Rad54 proteins. *Nature* 393, 91-94.
- 27 Petukhova, G., Sung, P., and Klein, H. (2000). Promotion of Rad51-dependent D-loop formation by yeast  
28 recombination factor Rdh54/Tid1. *Genes Dev.* 14, 2206-2215.
- 29 Piazza, A., and Heyer, W.D. (2018). Multi-invasion-induced rearrangements as a pathway for  
30 physiological and pathological recombination. *BioEssays*, e1700249.
- 31 Piazza, A., Koszul, R., and Heyer, W.D. (2018). A proximity ligation-based method for quantitative  
32 measurement of D-loop extension in *S. cerevisiae*. *Methods Enzymol.* 601, 27-44.
- 33 Piazza, A., Wright, W.D., and Heyer, W.D. (2017). Multi-invasions are recombination byproducts that  
34 induce chromosomal rearrangements. *Cell* 170, 760-773 e715.
- 35 Prakash, R., Satory, D., Dray, E., Papusha, A., Scheller, J., Kramer, W., Krejci, L., Klein, H., Haber, J.E.,  
36 Sung, P., *et al.* (2009). Yeast Mph1 helicase dissociates Rad51-made D-loops: implications for crossover  
37 control in mitotic recombination. *Genes Dev.* 23, 67-79.
- 38 Prasad, T.K., Robertson, R.B., Visnapuu, M.L., Chi, P., Sung, P., and Greene, E.C. (2007). A DNA-  
39 translocating Snf2 molecular motor: *Saccharomyces cerevisiae* Rdh54 displays processive translocation  
40 and extrudes DNA loops. *J. Mol. Biol.* 369, 940-953.
- 41 Putnam, C.D., Hayes, T.K., and Kolodner, R.D. (2009). Specific pathways prevent duplication-mediated  
42 genome rearrangements. *Nature* 460, 984-989.
- 43 Putnam, C.D., and Kolodner, R.D. (2017). Pathways and mechanisms that prevent genome instability in  
44 *Saccharomyces cerevisiae*. *Genetics* 206, 1187-1225.
- 45 Putnam, C.D., Srivatsan, A., Nene, R.V., Martinez, S.L., Clotfelter, S.P., Bell, S.N., Somach, S.B., de  
46 Souza, J.E.S., Fonseca, A.F., de Souza, S.J., *et al.* (2016). A genetic network that suppresses genome  
47 rearrangements in *Saccharomyces cerevisiae* and contains defects in cancers. *Nat. Commun.* 7.
- 48 Renkawitz, J., Lademann, C.A., Kalocsay, M., and Jentsch, S. (2013). Monitoring homology search  
49 during DNA double-strand break repair *in vivo*. *Mol. Cell* 50, 261-272.

- 1 Ruiz, J.F., Gomez-Gonzalez, B., and Aguilera, A. (2009). Chromosomal translocations caused by either  
2 Pol32-dependent or Pol32-independent triparental break-induced replication. *Mol. Cell. Biol.* 29, 5441-  
3 5454.
- 4 Sanchez, H., Kertokalio, A., van Rossum-Fikkert, S., Kanaar, R., and Wyman, C. (2013). Combined  
5 optical and topographic imaging reveals different arrangements of human RAD54 with presynaptic and  
6 postsynaptic RAD51-DNA filaments. *Proc. Natl. Acad. Sci. USA* 110, 11385-11390.
- 7 Santa Maria, S.R., Kwon, Y., Sung, P., and Klein, H.L. (2013). Characterization of the interaction  
8 between the *Saccharomyces cerevisiae* Rad51 recombinase and the DNA translocase Rdh54. *J. Biol.*  
9 *Chem.* 288.
- 10 Schwacha, A., and Kleckner, N. (1995). Identification of double Holliday junctions as intermediates in  
11 meiotic recombination. *Cell* 83, 783-791.
- 12 Sebesta, M., Burkovics, P., Haracska, L., and Krejci, L. (2011). Reconstitution of DNA repair synthesis in  
13 vitro and the role of polymerase and helicase activities. *DNA Rep* 10, 567-576.
- 14 Shinohara, M., Shita-Yamaguchi, E., Buerstedde, J.M., Shinagawa, H., Ogawa, H., and Shinohara, A.  
15 (1997). Characterization of the roles of the *Saccharomyces cerevisiae* RAD54 gene and a homologue of  
16 RAD54, RDH54/TID1, in mitosis and meiosis. *Genetics* 147, 1545-1556.
- 17 Shor, E., Gangloff, S., Wagner, M., Weinstein, J., Price, G., and Rothstein, R. (2002). Mutations in  
18 homologous recombination genes rescue *top3* slow growth in *Saccharomyces cerevisiae*. *Genetics* 162,  
19 647-662.
- 20 Sikorski, R.S., and Hieter, P. (1989). A system of shuttle vectors and yeast host strains designed for  
21 efficient manipulation of DNA in *Saccharomyces cerevisiae*. *Genetics* 122, 19-27.
- 22 Smith, C.E., Lam, A.F., and Symington, L.S. (2009). aberrant double-strand break repair resulting in half  
23 crossovers in mutants defective for Rad51 or the DNA polymerase delta complex. *Mol. Cell. Biol.* 29,  
24 1432-1441.
- 25 Stafa, A., Donnianni, R.A., Timashev, L.A., Lam, A.F., and Symington, L.S. (2014). Template switching  
26 during break-induced replication is promoted by the Mph1 helicase in *Saccharomyces cerevisiae*.  
27 *Genetics* 196, 1017-1028.
- 28 Sugawara, N., Wang, X., and Haber, J.E. (2003). *In vivo* roles of Rad52, Rad54, and Rad55 proteins in  
29 Rad51-mediated recombination. *Mol. Cell* 12, 209-219.
- 30 Sun, W., Nandi, S., Osman, F., Ahn, J.S., Jakovleska, J., Lorenz, A., and Whitby, M.C. (2008). The  
31 FANCM ortholog Fml1 promotes recombination at stalled replication forks and limits crossing over  
32 during DNA double-strand break repair. *Mol. Cell* 32, 118-128.
- 33 Szostak, J.W., Orr-Weaver, T.L., Rothstein, R.J., and Stahl, F.W. (1983). The double-strand-break repair  
34 model for recombination. *Cell* 33, 25-35.
- 35 Tang, S., Wu, M.K.Y., Zhang, R., and Hunter, N. (2015). Pervasive and essential roles of Topoisomerase  
36 3 decatenase in meiosis orchestrate homologous recombination and facilitate chromosome segregation.  
37 *Mol. Cell* 57, 607-621.
- 38 Tay, Y.D., Sidebotham, J.M., and Wu, L. (2010). Mph1 requires mismatch repair-independent and -  
39 dependent functions of MutS alpha to regulate crossover formation during homologous recombination  
40 repair. *Nucleic Acids Res.* 38, 1889-1901.
- 41 Treco, D.A., and Lundblad, V. (2001). Preparation of yeast media. *Curr. Protoc. Mol. Biol.* Chapter 13,  
42 Unit13 11.
- 43 Tsaponina, O., and Haber, J.E. (2014). Frequent interchromosomal template switches during gene  
44 conversion in *S. cerevisiae*. *Mol. Cell* 55, 615-625.
- 45 Veaute, X., Jeusset, J., Soustelle, C., Kowalczykowski, S.C., Le Cam, E., and Fabre, F. (2003). The Srs2  
46 helicase prevents recombination by disrupting Rad51 nucleoprotein filaments. *Nature* 423, 309-312.
- 47 Weinstein, J., and Rothstein, R. (2008). The genetic consequences of ablating helicase activity and the  
48 Top3 interaction domain of Sgs1. *DNA Rep.* 7, 558-571.
- 49 Welz-Voegele, C., and Jinks-Robertson, S. (2008). Sequence divergence impedes crossover more than  
50 noncrossover events during mitotic gap repair in yeast. *Genetics* 179, 1251-1262.

- 1 White, C.I., and Haber, J.E. (1990). Intermediates of recombination during mating type switching in  
2 *Saccharomyces cerevisiae*. *EMBO J.* 9, 663-673.
- 3 Wright, W.D., and Heyer, W.D. (2014). Rad54 functions as a heteroduplex DNA pump modulated by its  
4 DNA substrates and Rad51 during D loop formation. *Mol. Cell* 53, 420-432.
- 5 Wright, W.D., Shah, S.S., and Heyer, W.D. (2018). Homologous recombination and the repair of DNA  
6 double-strand breaks. *J. Biol. Chem.*
- 7 Wu, L.J., and Hickson, I.D. (2003). The Bloom's syndrome helicase suppresses crossing-over during  
8 homologous recombination. *Nature* 426, 870-874.
- 9 Zelensky, A., Kanaar, R., and Wyman, C. (2014). Mediators of homologous DNA pairing. *Cold Spr.*  
10 *Harb. Perspect. Biol.* 6, a016451.
- 11 Zheng, X.F., Prakash, R., Saro, D., Longerich, S., Niu, H.Y., and Sung, P. (2011). Processing of DNA  
12 structures via DNA unwinding and branch migration by the *S. cerevisiae* Mph1 protein. *DNA Rep.* 10,  
13 1034-1043.
- 14 Zhu, Z., Chung, W.H., Shim, E.Y., Lee, S.E., and Ira, G. (2008). Sgs1 helicase and two nucleases Dna2  
15 and Exo1 resect DNA double-strand break ends. *Cell* 134, 981-994.
- 16 Zimmer, C., and Fabre, E. (2011). Principles of chromosomal organization: lessons from yeast. *J. Cell*  
17 *Biol.* 192, 723-733.
- 18 Zinovyev, A., Kuperstein, I., Barillot, E., and Heyer, W.D. (2013). Synthetic lethality between gene  
19 defects affecting a single non-essential molecular pathway with reversible steps. *PLoS Comp. Biol.* 9.

20

21

22

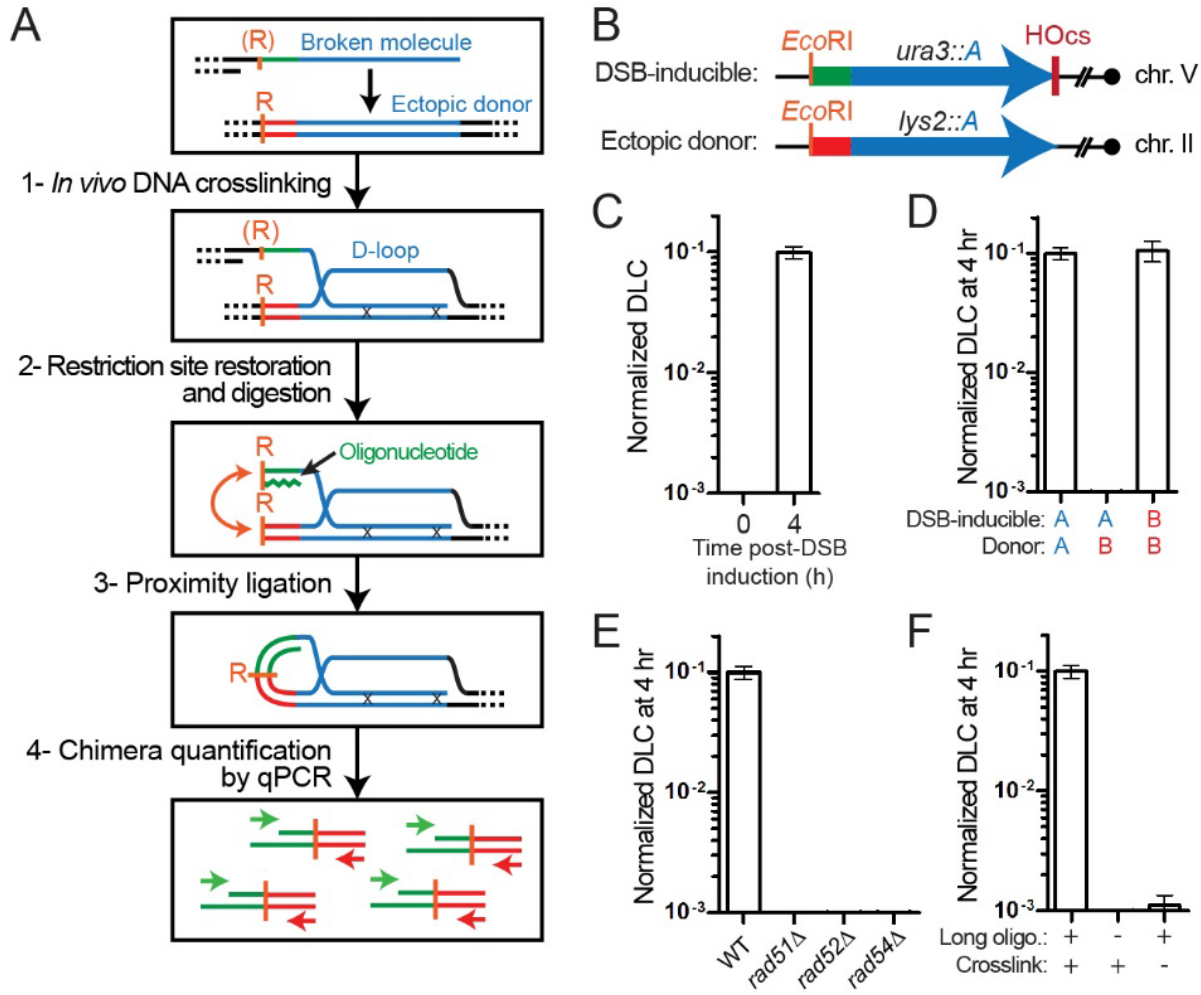

1

2 **Figure 1: The DLC assay detects D-loops in *S. cerevisiae*.** (A) Rationale of the DLC assay. (B)

3 DSB-inducible construct and ectopic donor in haploid *S. cerevisiae*. The region of homology

4 “A” is 2 kb-long. (C) DLC requires DSB induction on Chr. V. (D) DLC requires homology

5 between the broken molecule and the donor. (E) DLC is HR-dependent. (F) DLC requires inter-

6 strand DNA crosslink with Psoralen and restoration of the resected *EcoRI* site on the broken

7 molecule. (G) Kinetics of DSB formation and DLC in wild type cells. (C-G) Bars represent mean

8  $\pm$  SEM of at least a biological triplicate.

9

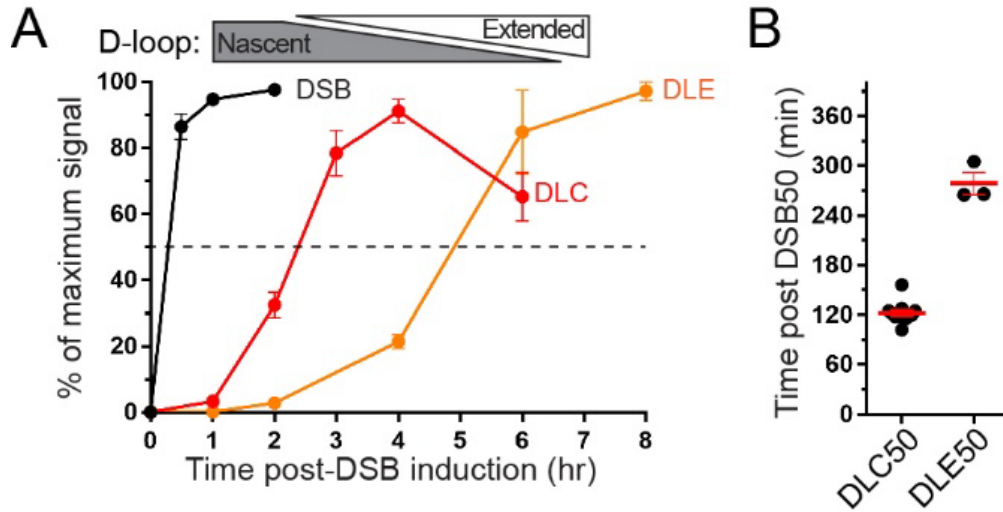

1

2 **Figure 2: D-loop formation and extension kinetics.** (A) Kinetics of DSB formation, DLC, and  
3 D-loop extension (DLE, see **Fig. S3**) (Piazza et al., 2018). DLC and DLE represent the mean  $\pm$   
4 SEM of 21 and 4 biological replicates, respectively. (B) DLC50 and DLE50 represent the time  
5 between 50 % of DSB formation and 50 % of the maximum DLC and DLE signal, respectively.

6

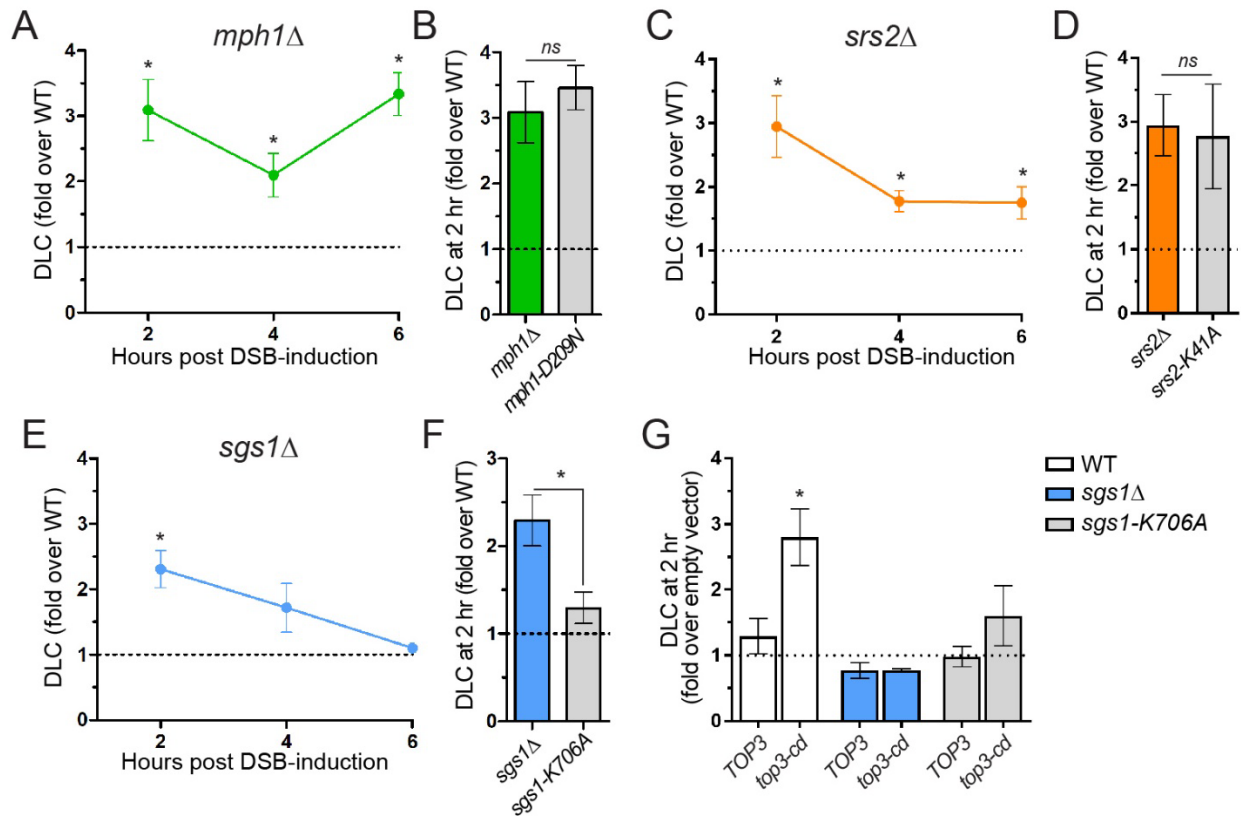

1

2 **Figure 3: D-loop regulation by Mph1, Srs2 and STR.** (A) Mph1 inhibits DLC at all time  
3 points. (B) DLC inhibition depends on the helicase activity of Mph1. (C) Srs2 inhibits DLC at all  
4 time points. (D) DLC inhibition depends on the helicase activity of Srs2. (E) Sgs1 inhibits DLC  
5 only 2 hr post-DSB induction and (F) in an ATPase-independent manner. (G) DLC inhibition by  
6 STR depends on Top3 catalytic activity. This inhibitory activity is epistatic to *SGS1* but  
7 independent of its helicase activity. Data represent mean  $\pm$ SEM of at least biological triplicates.  
8 \* indicates statistical significance ( $p < 0.05$ ). ns: not significant.

9

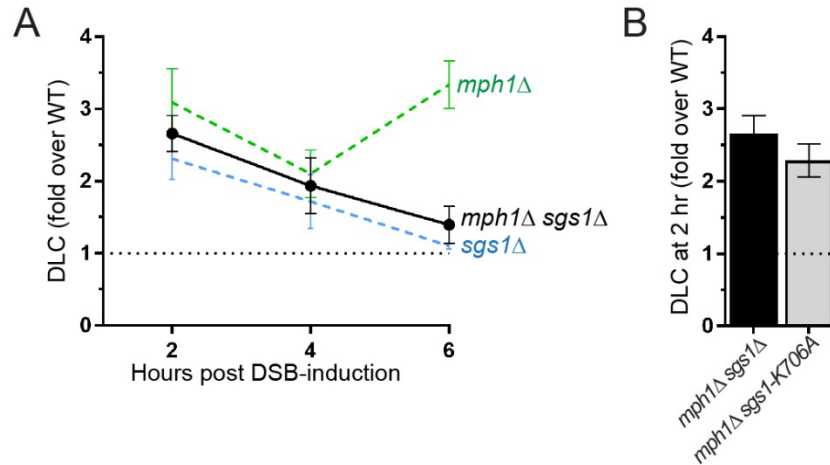

1

2 **Figure 4: Mph1 and STR belong to the same D-loop disruption pathway.** (A) *MPH1* and  
3 *SGS1* are epistatic in nascent DLC inhibition. (B) The helicase activity of Sgs1 plays no role in  
4 nascent D-loop processing in the absence of Mph1. Data represent mean  $\pm$ SEM of at least  
5 biological triplicates. \* indicates statistical significance ( $p < 0.05$ ).

6



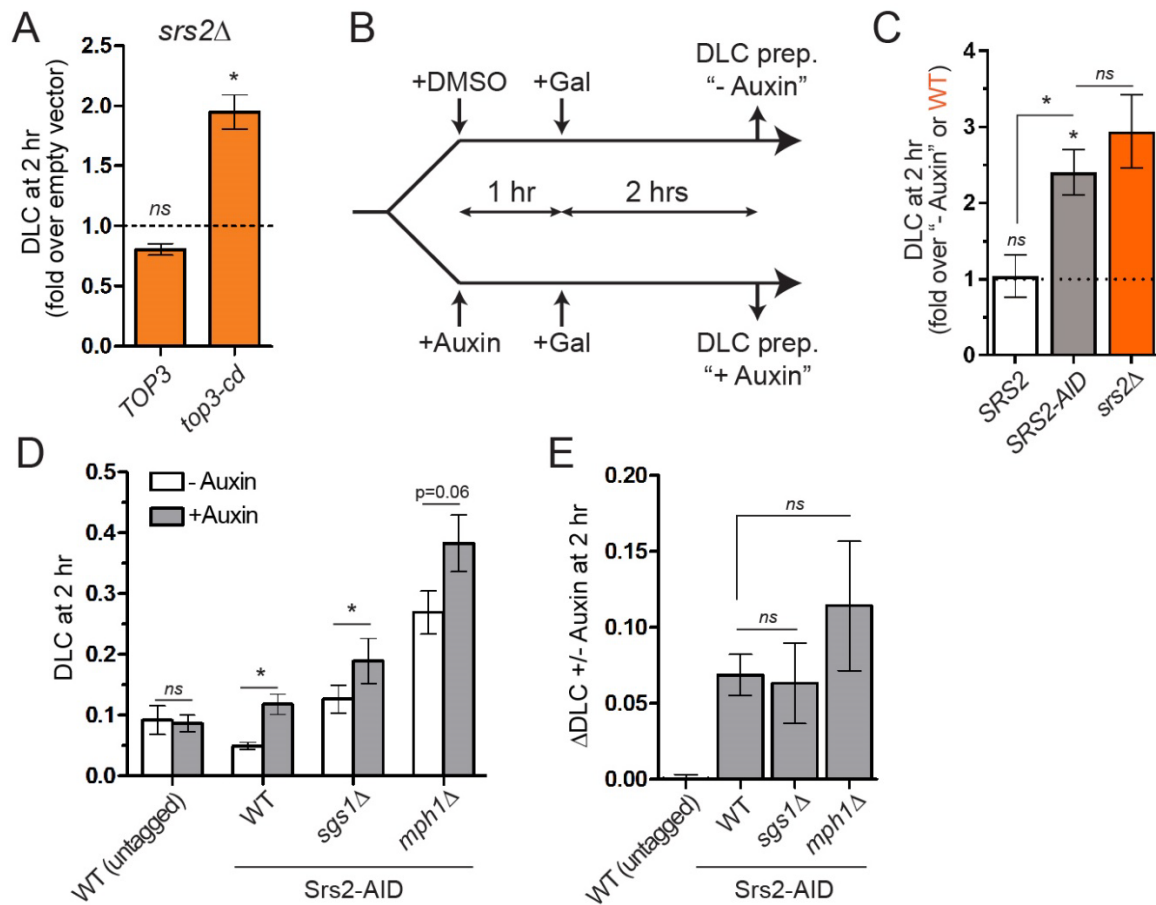

1

2 **Figure 5: Srs2 and Mph1-STR are part of two non-overlapping nascent D-loop disruption**  
 3 **pathways.** (A) Overexpression of *top3-cd* in a *srs2Δ* mutant causes an additional nascent DLC  
 4 increase. (B) Experimental scheme for Auxin-induced degradation of Srs2-AID. (C) Srs2-AID  
 5 degradation upon auxin addition mimicks the *srs2Δ* mutant. (D) DLC increases in wild type,  
 6 *sgs1Δ*, and *mph1Δ* strains upon Srs2-AID degradation. (E) Absolute extent of DLC increase in  
 7 wild type, *sgs1Δ* and *mph1Δ* strains upon Srs2-AID degradation. Data represent mean  $\pm$ SEM of  
 8 at least biological triplicates. \* indicates statistical significance ( $p < 0.05$ ). ns: not significant.

9

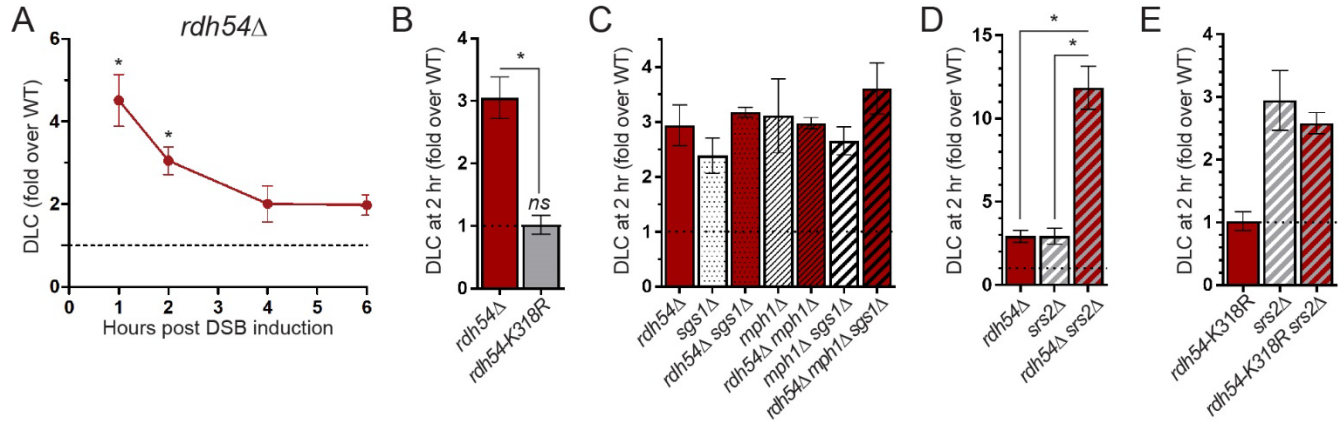

1

2 **Figure 6: Rdh54 demarcates the two D-loop disruption pathways.** (A) Rdh54 inhibits DLC at  
3 early time points. (B) Rdh54 inhibits DLC in an ATPase-independent fashion. (C) *RDH54* is  
4 epistatic to the STR-Mph1 nascent D-loop disruption axis. (D) Deletion of both *RDH54* and  
5 *SRS2* causes a synergistic DLC increase. (E) The ATPase activity of Rdh54 is not required for  
6 DLC inhibition in wild type cells or in a *srs2Δ* mutant. Data represent mean  $\pm$  SEM of at least  
7 biological triplicates, except *rdh54-K318R srs2Δ* (biological duplicate). \* $p < 0.05$ , paired t-test if  
8 compared to parallel wild type values. Unpaired otherwise.

9

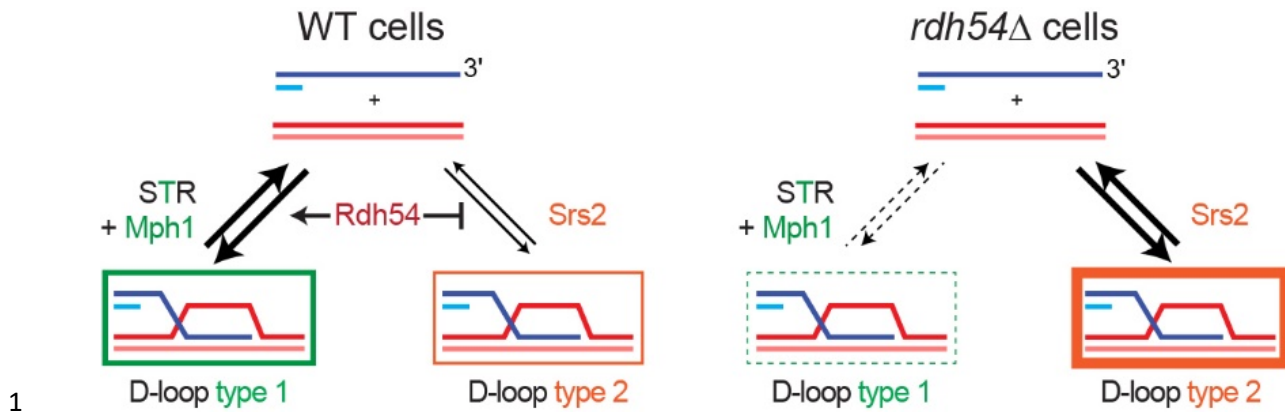

1

2 **Figure 7: Model for the regulation the nascent D-loops by Rdh54, STR-Mph1 and Srs2.**

3 The box thickness schematizes DLC levels. Type 2 D-loops are possibly longer than Type 1,

4 thus contributing more to DLC. For more details see **Fig. S6A**.

5

## 1 **Methods**

### 2 **Strains**

3 The genotype of the haploid *Saccharomyces cerevisiae* strains (W303 background) used in this  
4 study are listed **Table S1**. They contain a copy of the *HO* endonuclease gene under the control of  
5 the *GALI/10* promoter at the *TRP1* locus on Chr. IV (Pannunzio et al., 2008). A point mutation  
6 inactivates the HO cut-site at the mating-type locus (*MAT*) on Chr. III (*MAT $\alpha$ -inc* or *MAT $\alpha$ -inc*).  
7 The heterozygous DSB-inducible construct replaces *URA3* on Chr. V (-16 to +855 from the start  
8 codon). The DSB-inducible construct contains the 117 bp HO cut-site (Fishman Lobell and  
9 Haber, 1992), a sequence “A” (+4 to +2068 of the *LYS2* gene), and a 327 bp fragment of the  
10 PhiX genome flanked by multiple restriction sites. The “A” donor replaces the *LYS2* gene on  
11 Chr. II. The *URA3* locus on Chr. V and of the *LYS2* locus on Chr. II have been chosen because of  
12 their interstitial and untethered location (Agmon et al., 2013; Berger et al., 2008; Duan et al.,  
13 2010; Mine-Hattab and Rothstein, 2012; Zimmer and Fabre, 2011), which represents a  
14 maximally demanding homology search situation extensively used by others to study ectopic HR  
15 repair (Agmon et al., 2013; Inbar and Kupiec, 1999; Mazon and Symington, 2013; Mine-Hattab  
16 and Rothstein, 2012). Since the region of homology to the ectopic donor “A” does not  
17 encompass the DSB site, this system prevents formation of later intermediates involving both  
18 ends of the DSB, so as to focus our study on the regulation of D-loop intermediates. BIR (the  
19 only available repair pathway) is discouraged by the presence of the centromere (Morrow et al.,  
20 1997) and is in any case lethal. This system thus prevents resumption of growth and invasion of  
21 the population by cells undergoing early repair. We showed previously that the formation of BIR  
22 product are not detected prior to 8 hrs after DSB induction (Piazza et al., 2018). The annotated  
23 sequences of the DSB-inducible and donor constructs are available as ape files in **Dataset S1**.

24 To investigate the genetic interaction of *SRS2* with *SGS1* and *MPH1* we used a conditional  
25 protein degradation system induced by auxin (Morawska and Ulrich, 2013). Srs2 is fused to its  
26 C-terminus to an auxin-inducible degron (AID) tag together with 9-Myc (referred to as Srs2-  
27 AID). The Srs2 Strains bearing the un-induced Srs2-AID construct and lacking either the *SGS1*  
28 or *MPH1* genes grow normally (**Fig. S4B**), indicating that the AID tag does not impair the  
29 essential Srs2 function in these mutants. The gene encoding the AID-specific E3 ubiquitin ligase  
30 OsTIR1 under the control of *pADHI* promoter is constitutively expressed from a centromeric

1 vector (pRS314)(Sikorski and Hieter, 1989). Auxin (Sigma I5148) was dissolved in DMSO at  
2 285 mM. In the absence of auxin (equivalent DMSO concentration), Srs2-AID appears slightly  
3 more potent in DLC inhibition than untagged Srs2 (**Figs. S4C and 5D**). Srs2 is maximally  
4 depleted within 1 hr following auxin addition (2 mM final concentration) (**Fig. S4D**).  
5 Consequently Srs2-AID degradation is induced 1 hr before DSB induction (**Fig. 5B**). Auxin did  
6 not induce change of DLC, as shown in a treated strain bearing an untagged version of Srs2  
7 (**Figs. 5C and 5D**). The empty, *TOP3* and *top3-Y356F* over-expression vectors were kindly  
8 provided by Ian Hickson (Oakley and Hickson, 2002). The genes are under the control of a  
9 pGAL1 promoter on a 2-micron multi-copy plasmid (pYES2). The *rdh54-K318R* (*rdh54-K352R*  
10 in the S288c reference) mutant was kindly provided by Hannah Klein (Chi et al., 2006). Other  
11 mutants were generated by traditional gene replacement with antibiotic-resistance or prototrophic  
12 genes by regular lithium-acetate transformation.

### 13 **Culture media**

14 Synthetic dropout and rich YPD (1% yeast extract, 2% peptone, 2% dextrose) solid and liquid  
15 media have been prepared according to standard protocols(Treco and Lundblad, 2001). Liquid  
16 YEP-lactate (1% yeast extract, 2% peptone, 2% Lactate), Lactate-URA and Lactate-TRP (0.17%  
17 Yeast Nitrogen Base, 0.5% Ammonium Sulfate, respective 0.2% amino acids dropout, 2%  
18 Lactate) were made using 60% Sodium DL-lactate syrup. All the cultures were performed at  
19 30°C.

### 20 **DLC assay**

21 Cells were cultured to exponential phase in YEP-lactate and DSB at the HOcs on Chr. V was  
22 induced by HO expression upon galactose addition as described in (Piazza et al., 2017). A total  
23 of  $2 \cdot 10^8$  cells were collected before, or at various time post-DSB induction by galactose addition,  
24 pelleted and re-suspended in 2.5 mL of a Psoralen crosslinking solution (0.5 mg/mL Trioxsalen  
25 (Sigma-Aldrich T6137), 50 mM Tris HCl pH 8.0, 50 mM EDTA, 20% ethanol). Crosslink of  
26 cells was performed in a 60 mm petri dish upon long wave (365 nm) UV irradiation in a  
27 Spectrolinker XL-1500 (Spectroline) for 15 minutes with permanent orbital agitation (50-70  
28 rpm). Cells were washed in 50 mM Tris HCl pH 8, 50 mM EDTA and the pellet stored at -20°C.  
29 Cells were spheroplasted in a zymolyase solution (0.4 M Sorbitol, 0.4 M KCl, 0.5 mM MgCl<sub>2</sub>,  
30 40 mM Sodium Phosphate buffer pH7.2, 20 µg/mL Zymolyase 100T (US Biological)) for 15

1 min at 30°C. Zymolyase was washed 3 times in spheroplasting buffer at 2,500 g and 3 times in  
2 1X Cutsmart Buffer (NEB) at 16000 g. Cells were resuspended at a final concentration of  $4 \cdot 10^8$   
3 cells/mL in 1.4 X Cutsmart buffer containing 6 pM of a long hybridization oligonucleotide  
4 (olWDH1770, **Table S2**) to restore the *EcoRI* site on the resected broken molecule, and stored at  
5 -80°C. Chromatin of  $4 \cdot 10^7$  cells is solubilized upon incubation at 65°C for 10 min with 0.1%  
6 SDS, and SDS is quenched by addition of 1% Triton X100. DNA is digested by 20 units of  
7 *EcoRI*-HF (NEB) at 37°C for 1 hr. Proteins are denatured by addition of 2% SDS and incubation  
8 at 55°C for 10 min. Cells are put in ice and SDS is quenched by addition of 6% Triton X100.  
9 Ligation is performed in 800 µL of a ligation mix (50 mM Tris-HCl pH 8.0, 10 mM MgCl<sub>2</sub>, 10  
10 mM DTT, 1 mM ATP, 0.25 mg/mL BSA, 300 units of T4 DNA ligase (Bayou Biolabs)) at 16°C  
11 for 1h30. 25 µg/mL Proteinase K is added and proteins digested for 30 min at 65°C. DNA is  
12 extracted following a standard Phenol:Chloroform:Isoamyl Alcohol and isopropanol  
13 precipitation procedure. DNA pellets are re-suspended and incubated at 30°C in 50 µL 10 mM  
14 Tris HCl pH 8.0, 1 mM EDTA, 0.4 mg/mL RNaseA. The quantitative PCR was performed on a  
15 Roche LightCycler 480 machine using the SYBR Green I Master kit (Roche), according to the  
16 manufacturer instructions. After an initial denaturation phase, the cycling conditions were 95°C  
17 for 10", 66°C for 12", 72°C for 12", repeated 50 times. The nature of the amplified product was  
18 confirmed by a final thermal denaturation ramp. Six reactions were performed (**Fig. S1**, primers  
19 see **Table S2**): a loading standard (*ARG4*) on which the other reactions are normalized  
20 (olWDH1760 and 1761); an intra-molecular ligation efficiency control on a 1904 bp fragment at  
21 the *DAP2* locus (olWDH1762 and 1763); a control to verify DSB formation at HOcs on Chr. V  
22 (olWDH1766 and 1767); a control of *EcoRI* restriction site digestion on the broken molecule  
23 (olWDH1768 and 1769); a control of *EcoRI* restriction digestion of a control dsDNA locus  
24 (*DAP2*; olWDH1762 and 1769); a reaction to detect the DLC chimera, *i.e.* the product of the  
25 ligation of the 5' flanking regions of the broken molecule and the donor (olWDH1764 and 1765).  
26 DLC values were normalized on the intra-molecular ligation efficiency and in some instances  
27 corrected for the filament restriction digestion efficiency when differences exceeded ≈30%. Data  
28 were analyzed using the Light Cycler 480 Software 1.5.0.  
29  
30 For each mutant assayed, a wild type strain was also run in parallel to buffer for inter-experiment  
31 variations that are attributed to differences in the crosslinking efficiency. For *TOP3* and *top3-cd*

1 overexpression experiments, an empty vector control was performed in for each experiment. In  
2 the case of the Srs2-AID degradation experiments, the control “-Auxin” treatment was run in  
3 parallel of the “+Auxin” treatment. Consequently, data are shown normalized onto parallel wild  
4 type values (for deletion mutant or point mutant), on parallel empty vector control (Top3  
5 overexpression experiments), or on parallel DMSO-treated (Srs2-AID degradation experiments)  
6 samples.

### 7 **DLE assay**

8 The DLE assay was performed and analyzed as described in (Piazza et al., 2018).

### 9 **Western blot**

10 Proteins were extracted from  $2 \cdot 10^7$  cells by regular TCA procedure. Srs2-AID-9Myc and OsTir1-  
11 9Myc were detected with a mouse anti-c-Myc 9E11 antibody (Santa Cruz Biotechnology, sc-  
12 47694, lot F11 13) used at a 1:1000 dilution, and GAPDH was detected with a mouse anti-  
13 GAPDH GA1R from Thermo Scientific (MA5-15738, lot QG215126) at a 1:5000 dilution.

### 14 **Statistical analysis**

15 Mutant DLC values were compared to their paired wild type or empty vector controls with a  
16 paired Student’s t-test. Other comparisons between normalized DLC values were performed  
17 using unpaired Student’s t-test. Statistical cutoff was set to  $\alpha=0.05$  for all tests. All statistical  
18 tests were performed under R x64 3.2.0.

### 19 **Construct sequences**

20 The annotated sequences of the DSB-inducible and donor constructs used in this study are  
21 available as \*.ape (ApE Plasmid Editor) files in **Dataset S1**.

22
